# Supplementary material
Source: Springer Nature journal article supplement (https://www.springermedizin.de/resource/supplementary/12959_2010_140_MOESM8_ESM.pdf/9569698)

**Fig 5**

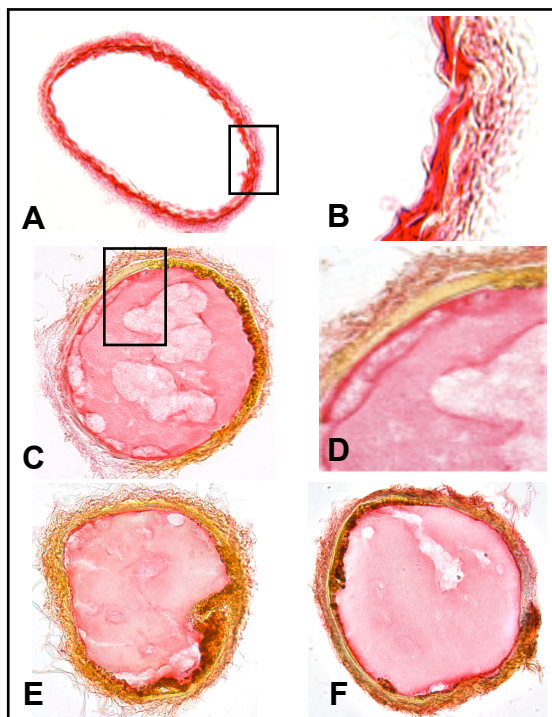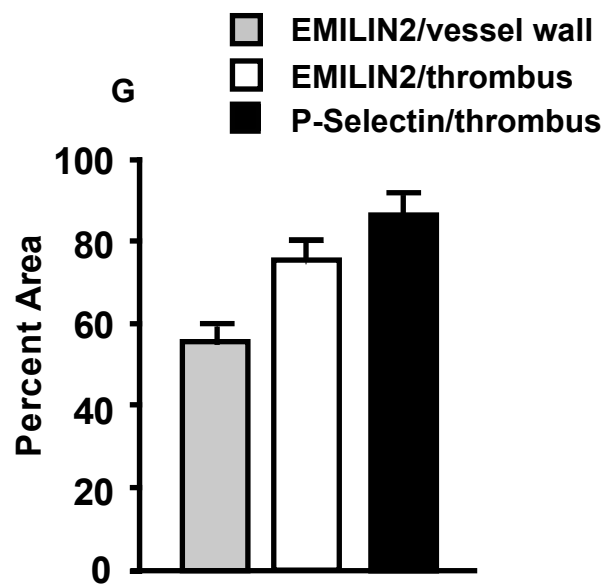

Supplement: MOESM8 [file 9569698]
